# Supplementary material for: NEDD4L Regulates the Proliferation and Metastasis of Non-small-cell Lung Cancer by Mediating CPNE1 Ubiquitination
Source: Research Square preprint supplement (doi:10.21203/rs.3.rs-250598/v1), 2021-02-26
Supplement: Supplementary file 1 [file 2032b1db658286c2566891ff.docx]

**Supplemental Table S2 Primer sequences used for the introduction of Flag-CPNE1 mutations.**

| Mutations | Primer Sequences |
| --- | --- |
| K60R | F:AAGCCCTGAGTTCTCCAGGACTCTACAGCTTGAGT  R:ACTCAAGCTGTAGAGTCCTGGAGAACTCAGGGCTT |
| K84R | F:CTATGACATAGACAACAGGACGCCAGAGCTGAGGG  R:CCCTCAGCTCTGGCGTCCTGTTGTCTATGTCATAG |
| K120R | F:GATGCTGAAGCCTGGAAGGCCTGCTGGGCGGGGGA  R:TCCCCCGCCCAGCAGGCCTTCCAGGCTTCAGCATC |
| K135R | F:CTCAGCTCAGGAATTAAGGGACAATCGTGTAGTAA  R:TTACTACACGATTGTCCCTTAATTCCTGAGCTGAG |
| K157R | F:GAAGGACTTCCTGGGAAGGTCAGATCCATTTCTGG  R:CCAGAAATGGATCTGACCTTCCCAGGAAGTCCTTC |
| K190R | F:CCTGAACCCTACATGGAGGCGTTTCTCAGTCCCCGT  R:ACGGGGACTGAGAAACGCCTCCATGTAGGGTTCAGG |
| K522R | F:AGGGTTGGGCCCCGCTCAGGCCACTTCCACCCTCAG  R:CTGAGGGTGGAAGTGGCCTGAGCGGGGCCCAACCCT |
| K529R | F:ACTTCCACCCTCAGCCAGGGATCCTGCACAGGCC  R:GGCCTGTGCAGGATCCCTGGCTGAGGGTGGAAGT |
