# Supplementary material for: NEDD4L Regulates the Proliferation and Metastasis of Non-small-cell Lung Cancer by Mediating CPNE1 Ubiquitination
Source: Research Square preprint supplement (doi:10.21203/rs.3.rs-250598/v1), 2021-02-26
Supplement: Supplementary file 2 [file 85383ac706cd2fd8a24dc1e8.docx]

**Supplementary Table S1. Demographic and clinical characteristics of patients and levels of CPNE1 protein expression in NSCLC tissue**

| Characteristics | n=14 | CPNE1 protein expression  high(n=10) low(n=4) | | *P* value |
| --- | --- | --- | --- | --- |
| Age (years) |  |  |  |  |
| ≤60 | 5（35.7%） | 2 | 3 | 0.095 |
| >60 | 9（64.3%） | 8 | 1 |
| Gender |  |  |  |  |
| Male | 9（64.3%） | 6 | 3 | 0.545 |
| Female | 5（35.7%） | 4 | 1 |
| Histological features |  |  |  |  |
| Adenocarcinoma | 10（85.7%） | 9 | 3 | 0.505 |
| Squamous cell carcinoma | 2（14.3%） | 1 | 1 |
|  |  |  |  |  |
| Smoker |  |  |  |  |
| Yes | 9（64.3%） | 7 | 2 | 0.706 |
| No | 5（35.7%） | 3 | 2 |
| Clinical stage |  |  |  |  |
| I +II | 5（35.7%） | 4 | 1 | 0.545 |
| III + IV | 9（64.3%） | 6 | 3 |
| Distant metastasis |  |  |  |  |
| No | 12（85.7%） | 10 | 2 | / |
| Yes | 2（14.3%） | 0 | 2 |
| Lymph node metastasis |  |  |  |  |
| No | 7（50%） | 6 | 1 | 0.505 |
| Yes | 7（50%） | 4 | 3 |

Data are presented as the mean ± SD values. The Kruskal-Wallis test was used for comparisons among three or more groups.
